# Supplementary material for: Role of Ca2+/calmodulin and PI3K/AKT signaling pathways and active ingredients of BaoTaiYin in treatment of recurrent miscarriage
Source: Front Mol Biosci. 2025 Mar 25;12:1573294. doi: 10.3389/fmolb.2025.1573294 (PMC11975862; doi:10.3389/fmolb.2025.1573294)
Supplement: Supplementary file 2 [file Table1.xlsx]

## Sheet: Supplemental Table 1
Supplemental Table 1: Identified main components of BaoTaiYin
No.	tR(min)	Precursor ion	Theoretical value(m/z)	Observed(m/z)	Diff(ppm)	Formula	Peak area	MS/MS	Identification	Classification
1	0.895	[M+H]+	116.071	116.071	0	C5H9NO2	83886.9	/	Proline	amino acid
2	0.897	[M+Cl]-	377.086	377.086	0.2	C12H22O11	2.82412e+06	377.0848;341.1079;179.0559;119.0352;89.0248	Sucrose	sugar
3	1.431	[M-H]-	191.02	191.02	4.1	C6H8O7	3.31666e+06	191.0196;129.0200;111.0094;87.0094	Citric acid	organic acid
4	2.683	[M-H]-	169.014	169.014	0.9	C7H6O5	222791	169.0139;125.0244;97.0288;79.0193	Gallic acid	phenolic acid
5	3.716	[M+H]+	166.086	166.086	0.9	C9H11NO2	65470	120.0812;103.0547;91.0537;77.0386	L-Phenylalanine	amino acid
6	4.992	[M+H]+	268.154	268.154	-0.5	C14H21NO4	657736	268.1532;161.0593;121.0649;88.0756;58.0651	Codonopsine	alkaloid
7	6.033	[M-H]-	255.051	255.052	2.2	C11H12O7	1.76594e+06	255.0517;193.0511;179.0358;165.0566;107.0503;72.9932	Piscidic acid	phenolic acid
8	6.768	[M-H]-	373.114	373.115	1.3	C16H22O10	282506	373.1141;211.0620;167.0723;149.0618;123.0457	Geniposidic acid	Cyclen ether terpene glycosides
9	7.518	[M-H]-	203.083	203.083	2	C11H12N2O2	70718.2	203.0844;142.0664;116.0500;74.0237	L-Tryptophan	amino acid
10	7.637	[M-H]-	515.141	515.141	0.5	C22H28O14	195282	515.1405;353.0869;191.0564;179.0356	(-)-4-O-(4-O-β-D-Glucopyranosylcaffeoyl) quinic acid	phenolic acid
11	8.014	[M+FA-H]-	695.204	695.206	2.4	C27H38O18	160072	695.2047;649.1981;487.1452;265.0713;163.0401;145.0294	6-O-[(2E)-3-(4-hydroxyphenyl)-1-oxo-2-propenyl]-β-D-fructofuranosyl-α-D-glucopyranoside+glucopyranosyl	phenolic acid
12	8.597	[M-H]-	375.13	375.129	-2.9	C16H24O10	2.0942e+06	375.1298;213.0771;169.0873;151.0769;113.0249;69.0349	Loganic acid	Cyclen ether terpene glycosides
13	9.147	[M-H]-	375.13	375.13	0.1	C16H24O10	672755	375.1315;195.0676;151.0772;89.0255;69.0353;59.0145	8-Epiloganic acid	Cyclen ether terpene glycosides
14	9.525	[M-H]-	353.088	353.086	-4	C16H18O9	1.32096e+06	353.0898;191.0572;173.0468	Chlorogenic acid	phenolic acid
15	9.887	[M-H]-	239.056	239.057	2	C11H12O6	934355	239.0557;177.0559;163.0404;149.0611;91.0556;72.9932	Eucomic acid	phenolic acid
16	10.067	[M-H]-	353.088	353.088	0.5	C16H18O9	420930	353.0869;191.0571;179.0362;173.0462;135.0453	Cryptochlorogenic acid	phenolic acid
17	10.271	[M-H]-	179.035	179.035	0.7	C9H8O4	888146	179.0354;135.0453;117.0341	Caffeic acid	phenolic acid
18	10.994	[M-H]-	487.146	487.147	3.3	C21H28O13	280846	487.1445;307.0824;265.0714;163.0401;145.0286;119.0500	6-O-[(2E)-3-(4-hydroxyphenyl)-1-oxo-2-propenyl]-β-D-fructofuranosyl-α-D-glucopyranoside	phenolic acid
19	11.163	[M+FA-H]-	433.135	433.135	0.8	C17H24O10	168478	433.1378;225.0777;207.0666;123.0454;101.0242	Geniposide	Cyclen ether terpene glycosides
20	11.581	[M+FA-H]-	403.125	403.126	4.5	C16H22O9	4.34546e+06	403.1230;357.1173;195.0659;179.0557;125.0249;81.0351	Sweroside	Cyclen ether terpene glycosides
21	13.435	[M+FA-H]-	727.245	727.247	1.5	C32H42O16	218469	681.2378;519.1888;357.1353;151.0410	Pinoresinol-di-O-β-glucopyranoside	lignin
22	14.051	[M-H]-	331.094	331.093	-0.8	C16H16N2O6	499073	331.0942;287.1036;269.0927;243.1137;225.1027;156.0815	2,6-Dimethyl-5-methoxycarbonyl-4-(3-nitrophenyl)-1,4-dihydropyridine-3-carboxylic acid	alkaloid
23	14.84	[M-H]-	359.135	359.135	1.5	C16H24O9	210164	359.1330;197.0818;153.0915;135.0808	Deoxyloganic acid	Cyclen ether terpene glycosides
24	15.529	[M-H]-	595.13	595.132	2.8	C26H28O16	221672	595.1344;300.0283;271.0254;255.0305	Quercetin-3-O-apiosyl-(1→2)-galactoside	flavonoid
25	15.861	[M+H]+	447.129	447.128	-1.1	C22H22O10	117539	447.1267;285.0763;270.0512;253.0496	Calycosin-7-O-β-D-glucoside	flavonoid
26	15.991	[M-H]-	417.119	417.12	1.7	C21H22O9	988216	417.1192;255.0669;135.0091;119.0507	Liquiritin	flavonoid
27	16.134	[M-H]-	549.161	549.162	1.2	C26H30O13	873925	549.1620;255.0664;135.0091;119.0505	Liquiritin apioside	flavonoid
28	16.621	[M-H]-	463.088	463.089	2.8	C21H20O12	1.23753e+06	463.0849;300.0257;271.0230;255.0281;151.0027	Hyperoside	flavonoid
29	17.034	[M-H]-	463.088	463.089	1.1	C21H20O12	505678	463.0903;300.0281;271.0249;255.0297;151.0050	Isoquercitrin	flavonoid
30	17.082	[M-H]-	477.067	477.068	1.5	C21H18O13	443443	477.0691;301.0346;178.9990;151.0039	Quercetin 3-O-glucuronide	flavonoid
31	18.66	[M-H]-	515.12	515.119	-0.6	C25H24O12	604068	515.1197;353.0868;335.0758;191.0558;179.0353;173.0454;135.0447	Isochlorogenic acid B	phenolic acid
32	18.934	[M-H]-	433.078	433.078	1.1	C20H18O11	1.02667e+06	433.0781;300.0272;271.0239;255.0296;151.0032	Avicularin	flavonoid
33	19.235	[M-H]-	515.12	515.12	1.6	C25H24O12	1.17844e+06	515.1238;353.0885;191.0563;179.0355;135.0453	Isochlorogenic acid A	phenolic acid
34	19.438	[M-H]-	447.093	447.094	0.7	C21H20O11	2.71147e+06	447.0942;300.0273;271.0241;255.0299;151.0040	Quercitrin	flavonoid
35	20.723	[M+FA-H]-	441.177	441.177	1.3	C20H28O8	164882	441.1773;215.1068;185.0978;159.0816;143.0713;119.0353;89.0246	Lobetyolin	acetylenic glycoside
36	20.771	[M-H]-	515.12	515.122	5.8	C25H24O12	2.24592e+06	515.1196;353.0870;191.0559;179.0350;173.0456;135.0451	Isochlorogenic acid C	phenolic acid
37	21.888	[M+H]+	933.35	933.349	-0.6	C44H56N2O20	187170	933.3499;771.2946;753.2862;609.2448;591.2335;381.1413	Pterocephaline	alkaloid
38	23.375	[M-H]-	269.093	269.093	-1.4	C15H14N2O3	874693	269.0930;225.1034;183.0929;156.0821	Cuscutamine	alkaloid
39	23.663	[M+H]+	933.35	933.343	-7.1	C44H56N2O20	130385	933.3496;771.2973;753.2852;591.2318;561.2095;381.1411;191.0694	Pterocephaline isomer	alkaloid
40	24.761	[M+H]+	517.134	517.133	-2.2	C25H24O12	295031	517.1366;269.0827;254.0593;237.0563;213.0938	Formononetin-7-O-β-D-glucoside-6"-O-malonate	flavonoid
41	25.148	[M+2FA-2H]2-	883.381	883.389	8.9	C76H124O40	497318	860.3894;837.3852;675.3261;369.1052;323.0984	Akebia saponin X	triterpenoid saponin
42	25.539	[M+2FA-2H]2-	663.305	663.308	4.4	C59H96O27	471217	911.5076;749.4529;603.3936;471.3519;323.0991	Macranthoidin A	triterpenoid saponin
43	26.11	[M+FA-H]-	973.501	973.506	4.4	C47H76O18	4.89197e+06	973.5024;927.4971;603.3917;323.0978;179.0559	Asperosaponin Ⅵ	triterpenoid saponin
44	26.662	[M-H]-	837.391	837.394	2.7	C42H62O17	369154	837.3886;351.0547;193.0344	Uralsaponin U	triterpenoid saponin
45	27.231	[M-H]-	329.233	329.233	-0.4	C18H34O5	732897	329.2320;229.1434;211.1336;171.1023;139.1128	9,12,13-Trihydroxy-10E-octadecenoic acid	fatty acid
46	27.616	[M-H]-	837.391	837.393	1.5	C42H62O17	383821	837.3921;351.0559;193.0357	Licoricesaponin G2	triterpenoid saponin
47	27.761	[M+FA-H]-	829.459	829.463	4.4	C41H68O14	31111.2	829.4644;783.4505;651.4138	Astragaloside Ⅳ	triterpenoid saponin
48	28.102	[M+FA-H]-	957.506	957.51	4.2	C47H76O17	231485	957.5135;911.5084;587.4008;323.0997	Asperosaponin V	triterpenoid saponin
49	28.487	[M-H]-	821.396	821.399	3.3	C42H62O16	2.50218e+06	821.3991;351.0583;193.0359	Glycyrrhizic acid	triterpenoid saponin
50	29.165	[M+FA-H]-	885.434	885.434	-0.4	C39H68O19	1.04075e+06	885.4342;659.3650;633.3494;407.2647;281.1228;243.1961	6-Acetate-O-6-deoxy-α-L-mannopyranosyl-(1→3)-O-[2(S),4(2R,3R)]-6-deoxy-4-O-(3-hydroxy-2-methyl-1-oxobutyl)-2-O-(11-hydroxy-1-oxotetradecyl)-α-L-mannopyranosyl-(1→2)-D-glucose	glucoside
51	29.464	[M-H]-	821.396	821.398	1.9	C42H62O16	592670	821.4020;351.0582;193.0356	Uralsaponin B	triterpenoid saponin
52	29.801	[M-H]-	821.396	821.4	4.2	C42H62O16	588794	821.4001;351.0568;193.0337	Licoricesaponin K2	triterpenoid saponin
53	31.297	[M+H]+	249.149	249.149	-0.1	C15H20O3	29073	231.1374;163.0752;143.0827;105.0701	AtractylenolideⅢ	sesquiterpene
54	31.966	[M+FA-H]-	913.48	913.48	-0.7	C45H72O16	174366	913.4586;867.4801;825.4762;271.2277	Astragaloside I	triterpenoid saponin
55	32.677	[M+FA-H]-	649.396	649.396	0.3	C35H56O8	212477	649.4002;603.3915;559.3818;471.3456	Cauloside A	triterpenoid saponin
56	35.158	[M+H]+	233.154	233.153	-2.6	C15H20O2	55134.6	233.1565;215.1450;187.1458;177.0901;159.0806	Atractylenolide Ⅱ	sesquiterpene
57	36.975	[M-H]-	483.312	483.313	2.7	C30H44O5	13080.8	483.3125;409.2737;365.2823	Poricoic acid B	triterpenoid
58	37.637	[M+H]+	231.138	231.138	1.5	C15H18O2	16912.8	231.1387;185.1306;128.0617;105.0723	Atractylenolide Ⅰ	sesquiterpene
59	38.079	[M-H]-	497.327	497.327	-1.1	C31H46O5	9055.44	497.3275;423.2915	Poricoic acid A	triterpenoid
60	38.267	[M-H]-	485.327	485.326	-3	C30H46O5	8296.02	485.3260;469.2508;441.3390	Poricoic acid G	triterpenoid
61	39.95	[M-H]-	299.259	299.259	0.8	C18H36O3	553676	299.2601;281.2490;253.2542;141.1290	12-Hydroxyoctadecanoic acid	fatty acid
